# Supplementary material for: Home-Field Advantage of Litter Decomposition Faded 5-10 Years After Spruce Forest Clearcutting
Source: Preprints.org preprint supplement (doi:10.20944/preprints202202.0036.v1), 2022-02-02
Supplement: Supplementary file 1 [file supplementary]

**Home-field advantage of litter decomposition faded 5-10 years after spruce forest clearcutting**

Liyan Zhuang1, Andrea Schnepf1, Kirsten Unger2, Ziyi Liang1, 3, * and Roland Bol1

*1* *Forschungszentrum Jülich, Agrosphäre (IBG-3), 52428 Jülich, Germany*

*2 Institute of Crop Science and Resource Conservation (INRES), Soil Science and Soil Ecology, University of Bonn, Nussallee 13, 53115 Bonn, Germany*

*3 Long-term Research Station of Alpine Forest Ecosystems, Key Laboratory of Ecological Forestry Engineering, Institute of Ecology and Forestry, Sichuan Agricultural University, Chengdu 611130, China*

** Corresponding author. chn_liangzy@163.com.*

# Supplementary and Materials


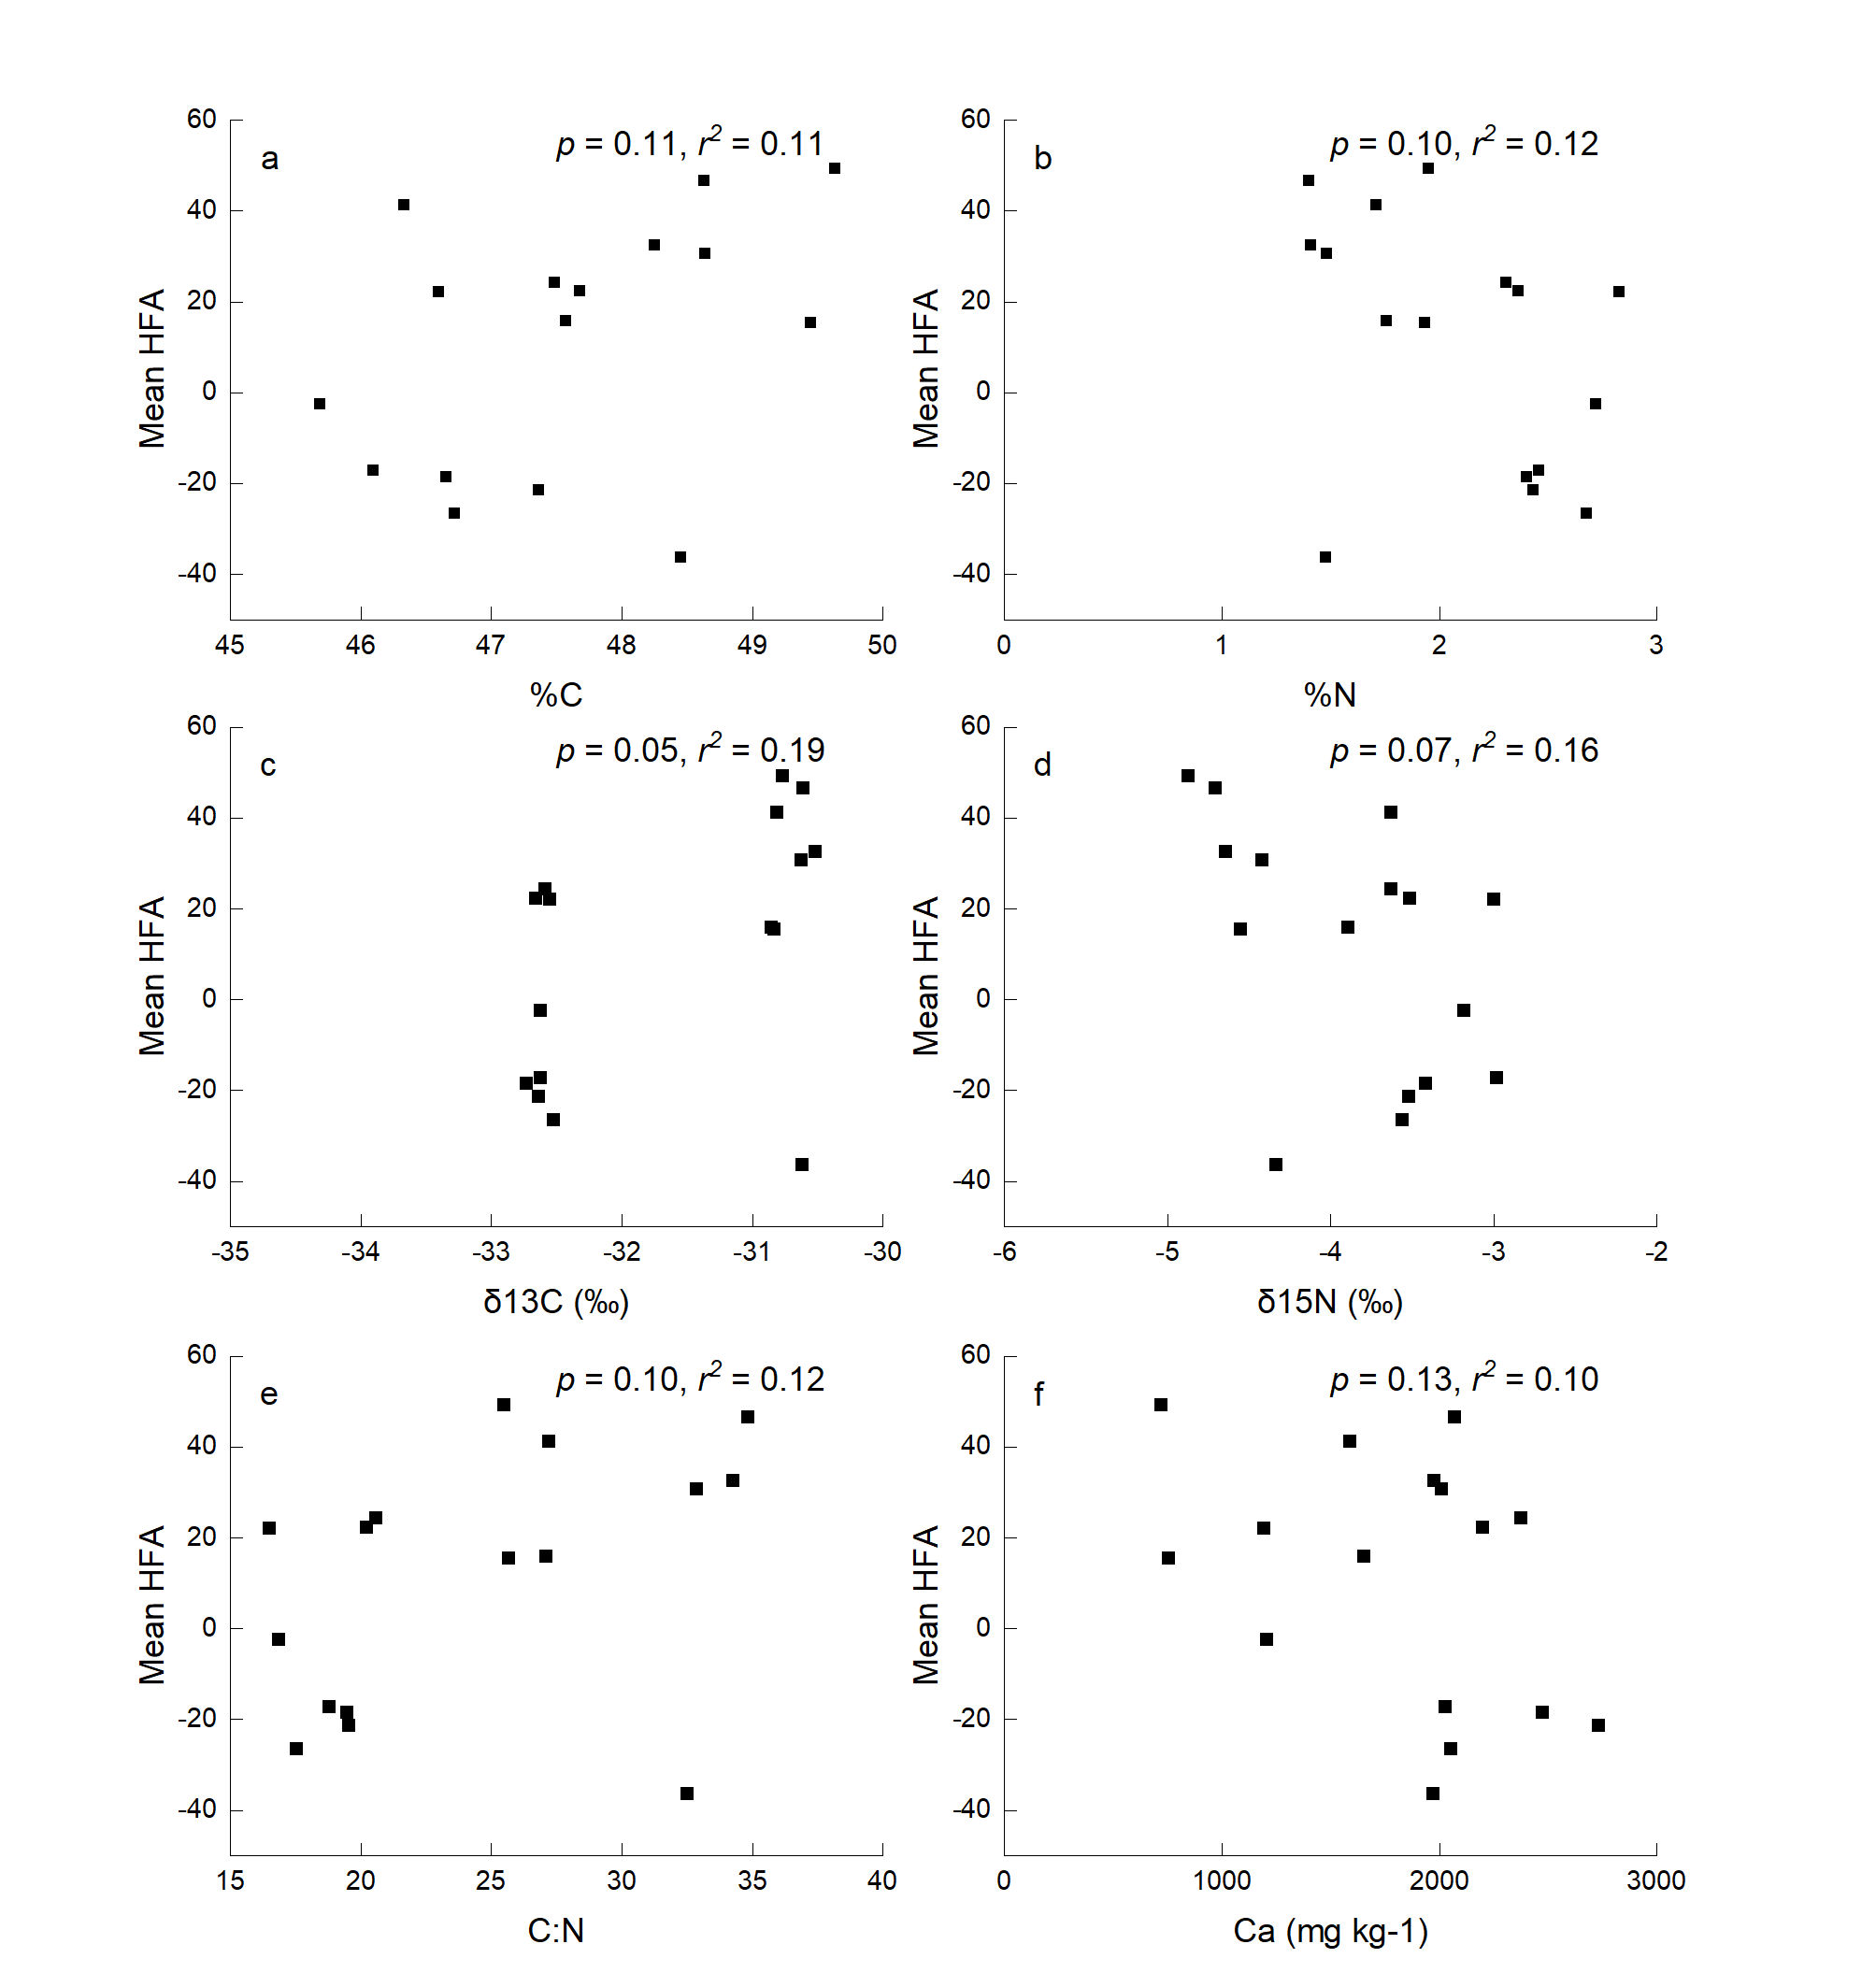
Fig. S1 the relationship between total C, N concentrations, δ13C, δ15N, C:N ratios, Ca and mean HFA


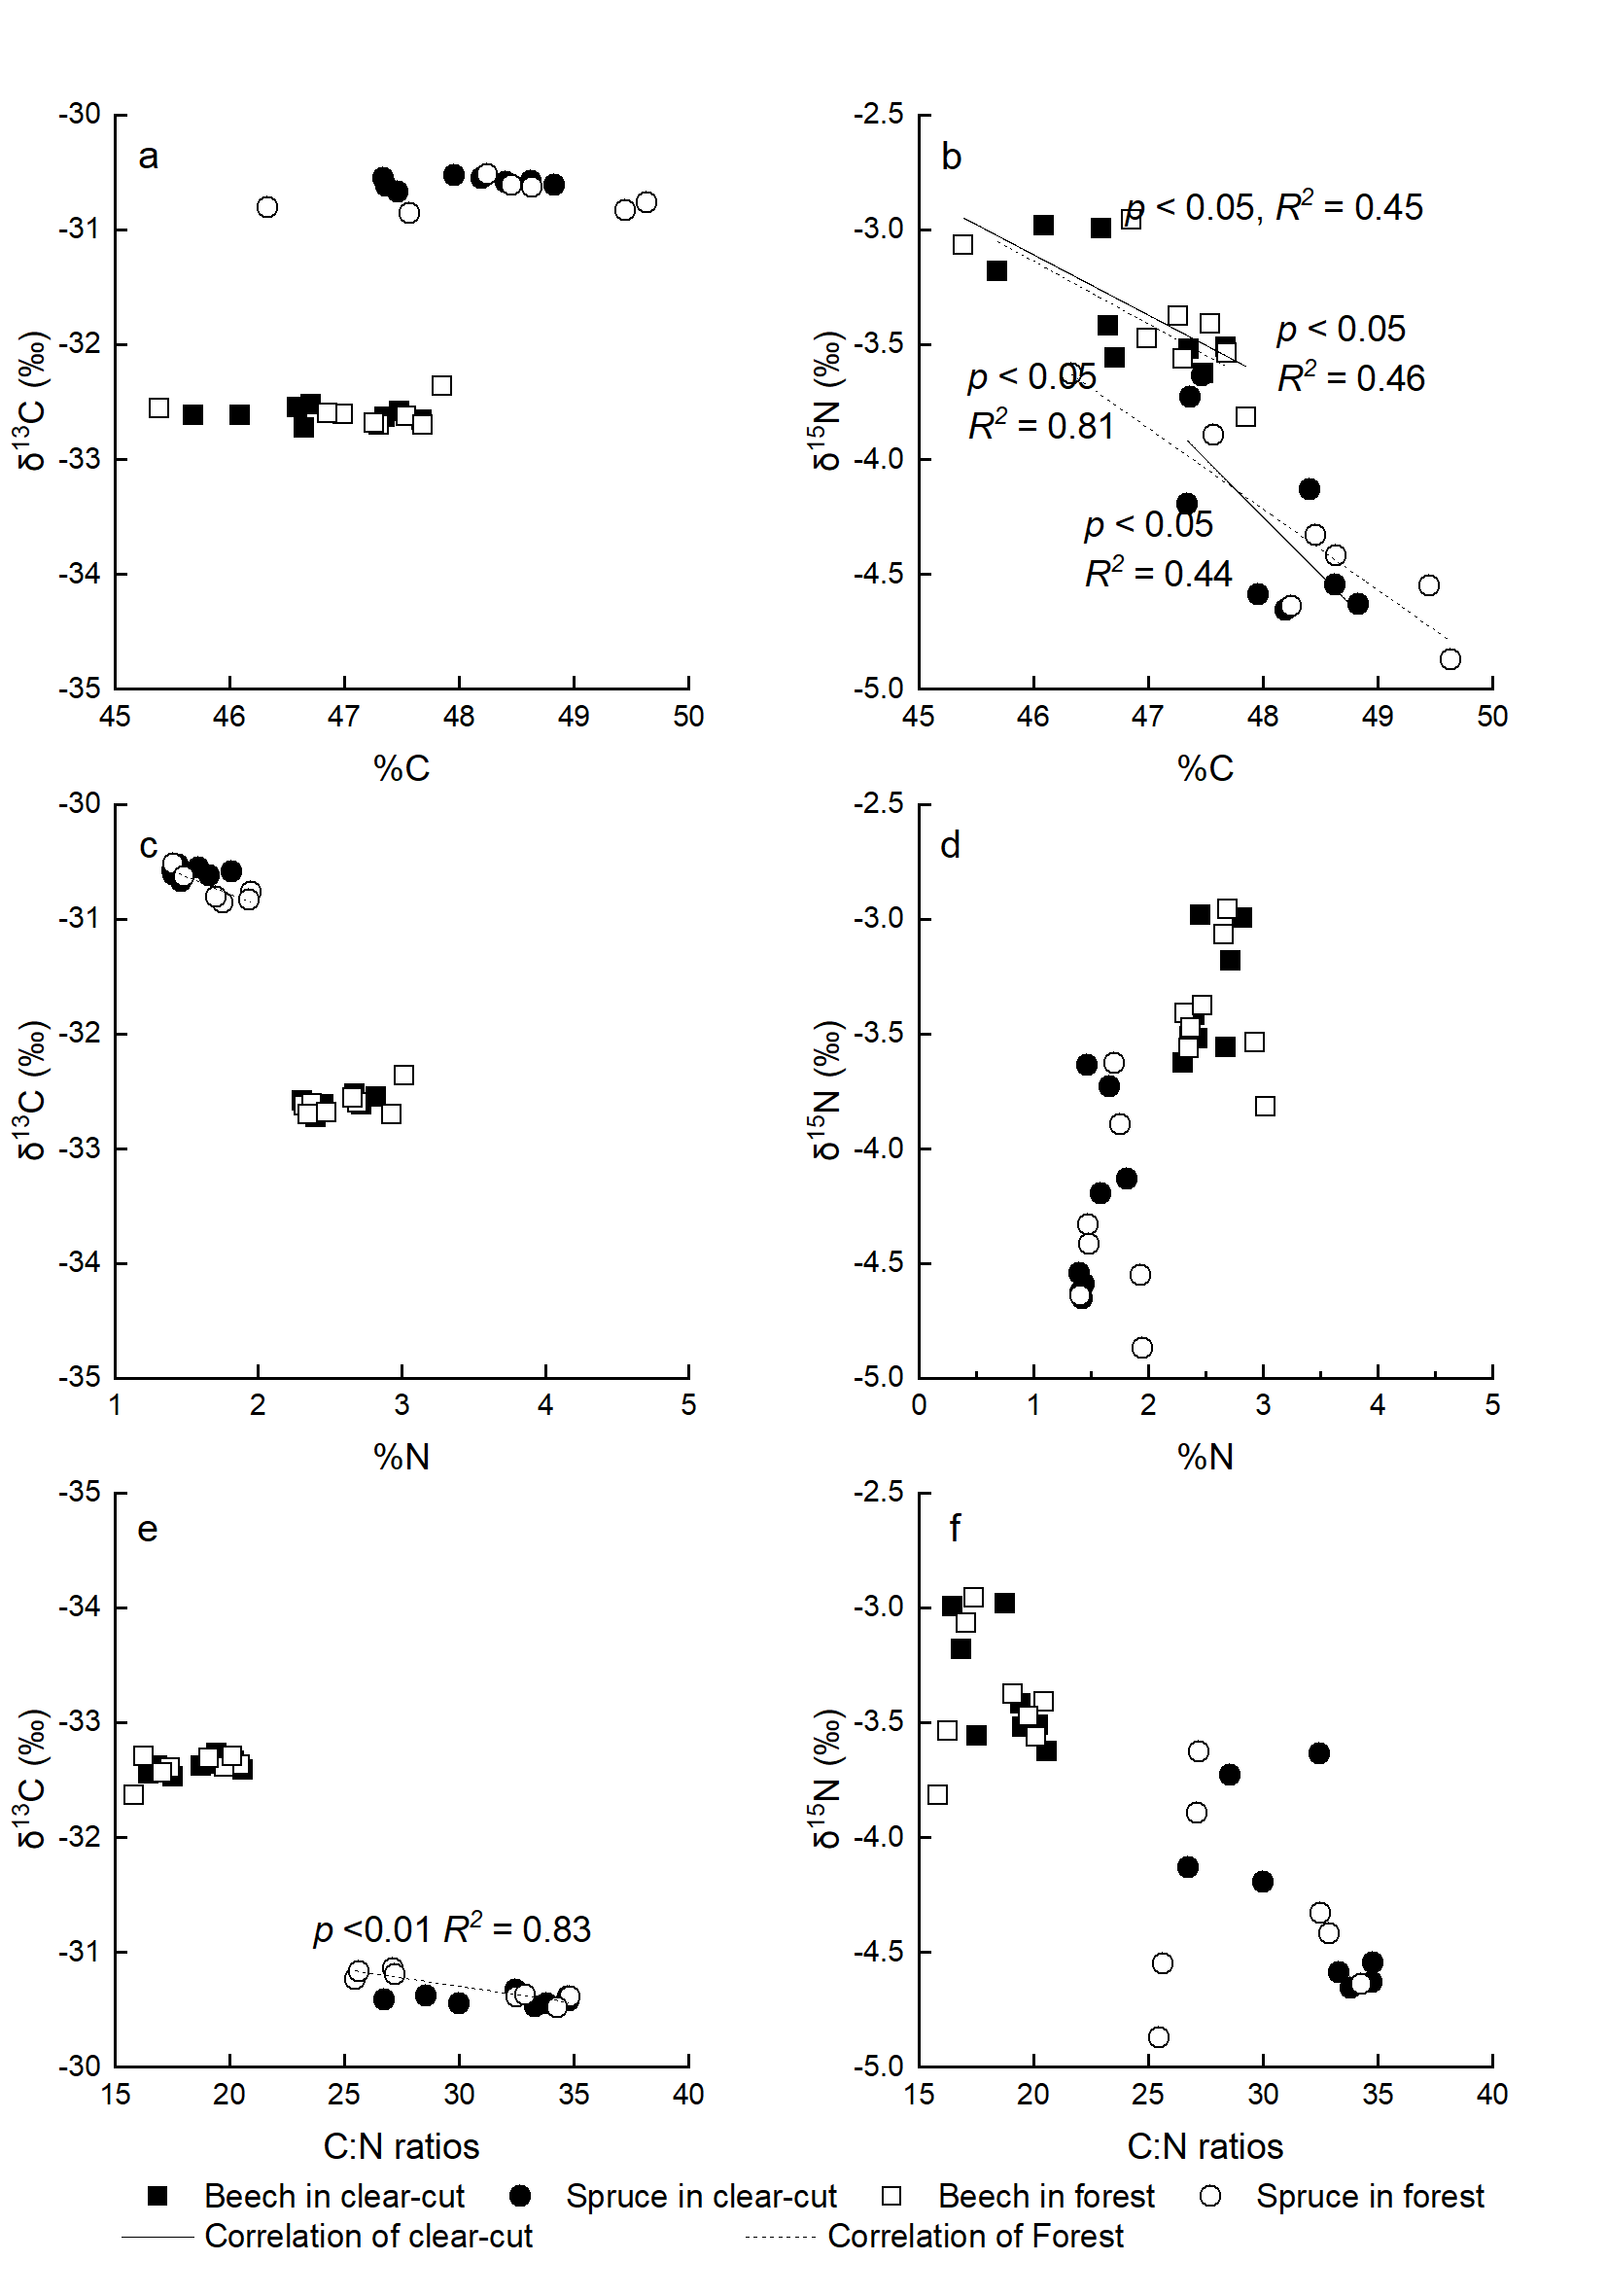
Fig. S2 the relationship between the initial litter C, N and C:N ratios on the isotopic 13C and δ15N value
